# Supplementary material for: Protocol for a scoping review to understand how interorganisational electronic health records affect hospital physician and pharmacist decisions
Source: PubMed Central journal article supplement — BMJ Open. 2019 Jan 15;9(1):e023712. doi: 10.1136/bmjopen-2018-023712 (PMC6340433; doi:10.1136/bmjopen-2018-023712), 2019-01-15
Supplement: bmjopen-2018-023712supp001.pdf [file bmjopen-2018-023712supp001.pdf]

### Appendix 1 - Proposed initial search strategy

| Stage | Search terms /description                                                                                                                                                                                                                                                                                                                         |
|-------|---------------------------------------------------------------------------------------------------------------------------------------------------------------------------------------------------------------------------------------------------------------------------------------------------------------------------------------------------|
| 1     | (("Decision-making" OR "Clinical decision-making" OR "Computer-assisted decision-making" OR "clinical decision support systems") AND ("Medical Records Systems, Computerized" OR "Electronic Health Records" OR "Hospital Information Systems" OR "Health Information Exchange"))<br><br>Date range: 2008/01/01 -- 2018/01/01<br><br>English only |
| 2     | Manual search in the reference lists of the included studies                                                                                                                                                                                                                                                                                      |
| 3     | Iterative refinements of stage 1, adapting to variant indexing practice in HDAS sources                                                                                                                                                                                                                                                           |
